# Supplementary material for: Novel La3Fe(MoO4)6 phase: magnetic properties and ethanol reactivity
Source: Royal Society of Chemistry journal article supplement (doi:10.1039/c5dt01444a), 2015-01-01
Supplement: c5dt01444a1.pdf [file c5dt01444a1.pdf]

**Table S1. Crystal data, measurement and structural refinement parameters of the studied  $\text{La}_3\text{Fe}(\text{MoO}_4)_6$**

| $\text{La}_3\text{Fe}(\text{MoO}_4)_6$                                                             |                                                       |
|----------------------------------------------------------------------------------------------------|-------------------------------------------------------|
| <b>Crystal data</b>                                                                                |                                                       |
| <b>Crys. symmetry</b>                                                                              | <b>orthorhombic</b>                                   |
| <b>space group</b>                                                                                 | <b>Pbca</b>                                           |
| <b>a (Å)</b>                                                                                       | <b>19.3164(11)</b>                                    |
| <b>b (Å)</b>                                                                                       | <b>10.4143(5)</b>                                     |
| <b>c (Å)</b>                                                                                       | <b>22.0594(12)</b>                                    |
| <b>V (Å<sup>3</sup>)</b>                                                                           | <b>4437.6(4)</b>                                      |
| <b>Z</b>                                                                                           | <b>8</b>                                              |
| <b>Dx (g/cm<sup>3</sup>)</b>                                                                       | <b>4.4415</b>                                         |
| <b><math>\mu</math> (mm<sup>-1</sup>) (for <math>\lambda</math> K<math>\alpha</math>=0.7107 Å)</b> | <b>10.105</b>                                         |
| <b>Appearance</b>                                                                                  | <b>orange-red</b>                                     |
| <b>Data collection</b>                                                                             |                                                       |
| <b><math>\lambda</math>(Mo K<math>\alpha</math>) (Å)</b>                                           | <b>0.71073</b>                                        |
| <b>Scan mode</b>                                                                                   | <b><math>\omega</math> and <math>\phi</math></b>      |
| <b><math>\theta</math>(min–max) (°)</b>                                                            | <b>1.85–36.79</b>                                     |
| <b>R(int) (%)</b>                                                                                  | <b>0.032</b>                                          |
| <b>Recording reciprocal space</b>                                                                  | <b>-24 ≤ h ≤ 32<br/>-17 ≤ k ≤ 17<br/>-33 ≤ l ≤ 28</b> |
| <b>Refinement</b>                                                                                  |                                                       |
| <b>Measured, independent obs.*refl.</b>                                                            | <b>10170</b>                                          |
| <b>No. of Refined parameters</b>                                                                   | <b>307</b>                                            |
| <b>Refin. method,</b>                                                                              | <b>F<sup>2</sup></b>                                  |
| <b>R1(F<sup>2</sup>)(obs) / R1(F<sup>2</sup>)(all)</b>                                             | <b>0.0218/0.0315</b>                                  |
| <b>wR2(F<sup>2</sup>)(obs) /wR2(F<sup>2</sup>)(all)</b>                                            | <b>0.0283/0.0307</b>                                  |
| <b>GOF(obs) / GOF(all)</b>                                                                         | <b>1.41/1.44</b>                                      |
| <b><math>\Delta\rho_{\text{max}} / \Delta\rho_{\text{min}}</math> (e Å<sup>-3</sup>)</b>           | <b>1.37/-3.95</b>                                     |

**Table S2. Atomic coordinates and equivalent isotropic displacement parameters ( $\text{\AA}^2$ ) for  $\text{La}_3\text{Fe}(\text{MoO}_4)_6$** 

| Atom | Wyckoff position | x            | y             | z            | $U_{\text{eq}}$ | BVS sum   |
|------|------------------|--------------|---------------|--------------|-----------------|-----------|
| La1  | 8c               | 0.393987(8)  | 0.050598(14)  | 0.231741(7)  | 0.01029(4)      | 3.005(7)  |
| La2  | 8c               | 0.615154(8)  | -0.059983(14) | 0.269137(7)  | 0.01022(4)      | 3.263(8)  |
| La3  | 8c               | 0.214111(8)  | 0.246231(13)  | 0.488597(7)  | 0.00994(4)      | 3.272(9)  |
| Mo1  | 8c               | 0.612449(11) | -0.04103(2)   | 0.458071(11) | 0.00894(6)      | 6.06(2)   |
| Mo2  | 8c               | 0.271712(11) | -0.23992(2)   | 0.178052(11) | 0.00895(5)      | 5.93(2)   |
| Mo3  | 8c               | 0.390481(11) | 0.04171(2)    | 0.039843(11) | 0.00930(6)      | 5.99(2)   |
| Mo4  | 8c               | 0.255757(11) | 0.00466(2)    | 0.358563(11) | 0.01136(6)      | 6.10(2)   |
| Mo5  | 8c               | 0.502167(12) | -0.27166(2)   | 0.164048(11) | 0.01020(6)      | 6.02(2)   |
| Mo6  | 8c               | 0.449273(12) | -0.26686(2)   | 0.338072(11) | 0.01096(6)      | 5.91(2)   |
| Fe1  | 8c               | 0.46960(2)   | -0.25449(4)   | 0.00152(2)   | 0.01019(11)     | 3.473(10) |
| O1   | 8c               | 0.44205(13)  | -0.26288(19)  | 0.41844(10)  | 0.0220(7)       | 2.051(11) |
| O2   | 8c               | 0.45806(11)  | 0.12574(19)   | 0.00373(10)  | 0.0204(6)       | 2.076(11) |
| O3   | 8c               | 0.39636(10)  | -0.12787(17)  | 0.02237(9)   | 0.0140(5)       | 2.158(9)  |
| O4   | 8c               | 0.58375(11)  | -0.2265(2)    | 0.18965(11)  | 0.0216(6)       | 2.080(11) |
| O5   | 8c               | 0.29158(11)  | -0.1032(2)    | 0.41095(10)  | 0.0233(6)       | 2.173(12) |
| O6   | 8c               | 0.53370(11)  | -0.1151(2)    | 0.47415(10)  | 0.0233(6)       | 2.165(11) |
| O7   | 8c               | 0.30967(11)  | 0.0913(2)     | 0.01416(11)  | 0.0253(7)       | 1.917(11) |
| O8   | 8c               | 0.39685(12)  | 0.0638(2)     | 0.11675(9)   | 0.0236(7)       | 2.028(12) |
| O9   | 8c               | 0.60892(9)   | 0.12141(17)   | 0.48614(9)   | 0.0128(5)       | 2.213(9)  |
| O10  | 8c               | 0.50953(10)  | 0.07526(18)   | 0.29926(9)   | 0.0165(5)       | 1.908(9)  |
| O11  | 8c               | 0.42767(12)  | -0.4220(2)    | 0.31327(10)  | 0.0256(7)       | 1.956(11) |
| O12  | 8c               | 0.68031(11)  | -0.1196(2)    | 0.49415(11)  | 0.0262(7)       | 2.036(12) |
| O13  | 8c               | 0.20740(11)  | 0.1173(2)     | 0.40067(10)  | 0.0234(6)       | 2.071(12) |
| O14  | 8c               | 0.31678(10)  | 0.23831(16)   | 0.20170(9)   | 0.0127(5)       | 2.054(9)  |
| O15  | 8c               | 0.46486(11)  | 0.25880(18)   | 0.18965(10)  | 0.0177(6)       | 1.925(10) |
| O16  | 8c               | 0.49737(12)  | -0.2872(2)    | 0.08465(9)   | 0.0227(6)       | 2.088(11) |
| O17  | 8c               | 0.32420(11)  | -0.35567(19)  | 0.21158(10)  | 0.0213(6)       | 2.025(11) |
| O18  | 8c               | 0.32102(12)  | 0.08161(19)   | 0.31713(10)  | 0.0235(6)       | 2.092(12) |
| O19  | 8c               | 0.20244(11)  | -0.0755(2)    | 0.30788(10)  | 0.0218(6)       | 2.140(12) |
| O20  | 8c               | 0.29561(10)  | -0.08266(18)  | 0.19850(10)  | 0.0173(6)       | 1.938(10) |
| O21  | 8c               | 0.62742(13)  | -0.0424(2)    | 0.38083(10)  | 0.0276(7)       | 2.044(12) |
| O22  | 8c               | 0.27829(13)  | -0.25366(19)  | 0.09970(11)  | 0.0241(7)       | 2.008(13) |
| O23  | 8c               | 0.39729(11)  | -0.1502(2)    | 0.30569(10)  | 0.0248(7)       | 1.838(12) |
| O24  | 8c               | 0.44542(11)  | -0.1537(2)    | 0.18821(10)  | 0.0254(7)       | 1.988(12) |

**Table S3: Atomic displacement parameters ( $\text{\AA}^2$ ) for  $\text{La}_3\text{Fe}(\text{MoO}_4)_6$** 

| Atom | U11         | U22         | U33         | U12         | U13         | U23         |
|------|-------------|-------------|-------------|-------------|-------------|-------------|
| La1  | 0.01101(6)  | 0.00935(6)  | 0.01051(8)  | -0.00017(5) | -0.00149(5) | 0.00023(5)  |
| La2  | 0.01335(7)  | 0.00787(6)  | 0.00943(7)  | 0.00008(5)  | -0.00026(5) | 0.00039(5)  |
| La3  | 0.00899(6)  | 0.01190(7)  | 0.00893(8)  | 0.00126(5)  | 0.00068(5)  | -0.00002(5) |
| Mo1  | 0.00905(9)  | 0.00785(9)  | 0.00991(11) | -0.00047(7) | -0.00042(8) | -0.00065(8) |
| Mo2  | 0.00831(9)  | 0.00984(9)  | 0.00870(10) | 0.00042(7)  | 0.00053(8)  | -0.00044(7) |
| Mo3  | 0.01020(9)  | 0.00726(9)  | 0.01045(11) | -0.00012(7) | -0.00049(8) | -0.00089(8) |
| Mo4  | 0.01470(10) | 0.01096(10) | 0.00842(11) | 0.00096(8)  | -0.00019(8) | -0.00058(8) |
| Mo5  | 0.01061(9)  | 0.01120(10) | 0.00880(11) | 0.00092(7)  | -0.00087(8) | 0.00026(8)  |
| Mo6  | 0.01263(10) | 0.01293(10) | 0.00732(11) | -0.00119(7) | -0.00044(8) | -0.00031(8) |
| Fe1  | 0.01072(18) | 0.01056(18) | 0.0093(2)   | 0.00061(14) | 0.00016(16) | 0.00024(14) |
| O1   | 0.0335(13)  | 0.0249(11)  | 0.0077(10)  | -0.0020(9)  | -0.0033(9)  | -0.0020(8)  |
| O2   | 0.0205(10)  | 0.0157(10)  | 0.0251(12)  | -0.0072(8)  | 0.0024(9)   | 0.0020(9)   |
| O3   | 0.0142(9)   | 0.0088(8)   | 0.0190(10)  | -0.0001(7)  | 0.0028(8)   | -0.0018(7)  |
| O4   | 0.0149(9)   | 0.0273(11)  | 0.0226(12)  | -0.0048(8)  | -0.0038(9)  | -0.0074(9)  |
| O5   | 0.0291(11)  | 0.0228(11)  | 0.0178(11)  | 0.0052(9)   | 0.0003(9)   | 0.0090(9)   |
| O6   | 0.0181(10)  | 0.0171(10)  | 0.0347(13)  | -0.0083(8)  | 0.0072(10)  | -0.0009(9)  |
| O7   | 0.0170(10)  | 0.0277(12)  | 0.0313(13)  | 0.0102(9)   | -0.0036(9)  | -0.0033(10) |
| O8   | 0.0387(13)  | 0.0227(11)  | 0.0094(10)  | -0.0008(9)  | 0.0000(9)   | -0.0041(8)  |
| O9   | 0.0124(8)   | 0.0087(8)   | 0.0174(10)  | -0.0003(6)  | -0.0001(7)  | -0.0020(7)  |
| O10  | 0.0195(9)   | 0.0116(8)   | 0.0183(10)  | 0.0024(7)   | 0.0013(8)   | -0.0021(8)  |
| O11  | 0.0405(13)  | 0.0216(11)  | 0.0146(11)  | -0.0131(10) | 0.0016(10)  | -0.0070(9)  |
| O12  | 0.0226(11)  | 0.0252(11)  | 0.0308(13)  | 0.0134(9)   | -0.0082(10) | -0.0050(10) |
| O13  | 0.0251(11)  | 0.0249(11)  | 0.0203(11)  | 0.0076(9)   | -0.0007(9)  | -0.0097(9)  |
| O14  | 0.0104(8)   | 0.0124(8)   | 0.0151(10)  | 0.0004(6)   | -0.0023(8)  | -0.0002(7)  |
| O15  | 0.0144(9)   | 0.0198(10)  | 0.0190(11)  | 0.0016(7)   | 0.0012(9)   | -0.0033(8)  |
| O16  | 0.0267(11)  | 0.0311(12)  | 0.0104(10)  | -0.0026(9)  | -0.0080(9)  | 0.0026(9)   |
| O17  | 0.0205(10)  | 0.0168(10)  | 0.0265(12)  | 0.0055(8)   | -0.0067(9)  | 0.0018(9)   |
| O18  | 0.0321(12)  | 0.0171(10)  | 0.0215(12)  | -0.0045(9)  | 0.0127(10)  | -0.0015(9)  |
| O19  | 0.0230(10)  | 0.0229(11)  | 0.0193(11)  | 0.0003(8)   | -0.0062(9)  | -0.0067(9)  |
| O20  | 0.0166(9)   | 0.0129(9)   | 0.0223(11)  | -0.0035(7)  | -0.0026(8)  | -0.0024(8)  |
| O21  | 0.0435(14)  | 0.0281(12)  | 0.0111(11)  | -0.0036(10) | 0.0039(10)  | -0.0034(9)  |
| O22  | 0.0270(12)  | 0.0346(14)  | 0.0108(11)  | -0.0018(9)  | 0.0029(9)   | -0.0020(9)  |
| O23  | 0.0220(10)  | 0.0331(13)  | 0.0192(11)  | 0.0085(9)   | 0.0007(9)   | 0.0072(10)  |
| O24  | 0.0270(11)  | 0.0220(11)  | 0.0272(12)  | 0.0107(9)   | 0.0076(10)  | 0.0033(9)   |

**Table S4: Evolution of the specific surface area as a function of the attrition time for 20 g of  $\text{La}_3\text{Fe}(\text{MoO}_4)_6$** 

| Attrition time (h) | Specific surface area ( $\text{m}^2/\text{g}$ ) |
|--------------------|-------------------------------------------------|
| 0                  | 0.4                                             |
| 1                  | 2.1                                             |
| 2                  | 2.9                                             |
| 3                  | 3.2                                             |
| 4                  | 5.6                                             |
